# Supplementary material for: Vanillic Acid Improves Comorbidity of Cancer and Obesity through STAT3 Regulation in High-Fat-Diet-Induced Obese and B16BL6 Melanoma-Injected Mice
Source: PubMed Central journal article supplement (PMC7464557; doi:10.3390/biom10081098), 2020-07-24
Supplement: biomolecules-10-01098-s001.pdf [file biomolecules-10-01098-s001.pdf]

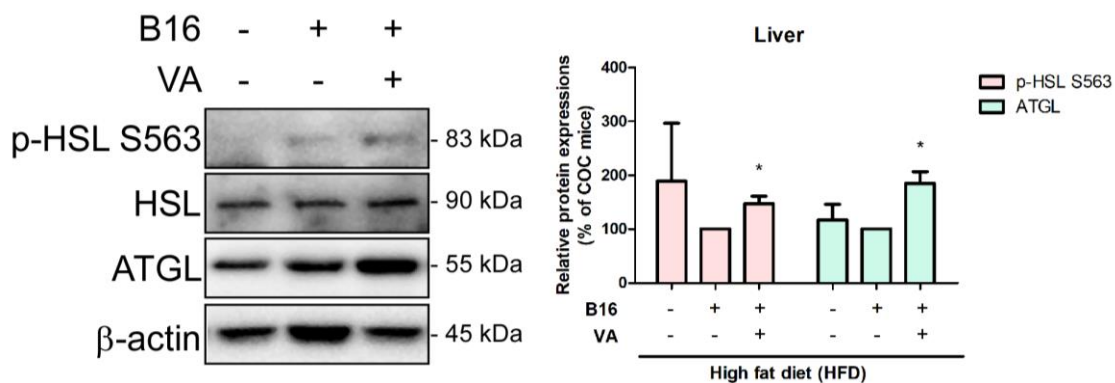

**Supplementary Figure S1.** Effect of VA on lipolysis markers in liver of COC mice. (A) Protein levels of p-HSL and ATGL were analyzed by a Western blot analysis. p-HSL was expressed relative to total HSL and ATGL was expressed relative to  $\beta$ -actin. All data are expressed as mean  $\pm$  S.E.M. ( $n = 3$ ). \* $p < 0.05$  vs. vehicle-treated COC mice. COC, cancer-obesity comorbidity; HFD, high fat diet; VA, vanillic acid.
